# Supplementary material
Source: publisher site journal article supplement (https://www.kjim.org/upload/media/kjim-2020-633-suppl3.pdf)
Supplement: Supplementary file 1 [file kjim-2020-633-suppl3.pdf]

**Supplementary Table 3. Comparison between SLE patients with and without COVID-19 (SARS-CoV-2 positive)**

| Variable                         | Patients with COVID-19<br>(n = 20) | Negative controls<br>(n = 263) | p value |
|----------------------------------|------------------------------------|--------------------------------|---------|
| Age ≥ 50 years <sup>a</sup>      | 15 (75.0)                          | 180 (68.4)                     | 0.541   |
| Female sex <sup>a</sup>          | 16 (80.0)                          | 219 (83.3)                     | 0.707   |
| Comorbidities <sup>b</sup>       |                                    |                                |         |
| Diabetes mellitus                | 0                                  | 3 (1.1)                        | 0.631   |
| Hypertension                     | 0                                  | 5 (1.9)                        | 0.534   |
| Cardiovascular disease           | 0                                  | 6 (2.3)                        | 0.495   |
| Chronic lung disease             | 1 (5.0)                            | 2 (0.8)                        | 0.074   |
| Chronic kidney disease           | 0                                  | 2 (0.8)                        | 0.696   |
| Current medications <sup>c</sup> |                                    |                                |         |
| Glucocorticoid                   | 13 (65.0)                          | 156 (59.3)                     | 0.617   |
| Glucocorticoid dose ≥ 10 mg/day  | 13 (65.0)                          | 144 (54.8)                     | 0.374   |
| Hydroxychloroquine               | 3 (15.0)                           | 65 (24.7)                      | 0.327   |
| Methotrexate                     | 1 (5.0)                            | 10 (3.8)                       | 0.789   |
| Tacrolimus                       | 0                                  | 6 (2.3)                        | 0.495   |

Values are presented as number (%).

SLE, systemic lupus erythematosus; COVID-19, coronavirus disease 2019; SARS-CoV-2, severe acute respiratory syndrome coronavirus 2.

<sup>a</sup>As recorded on the date of COVID-19 testing.

<sup>b</sup>Information on comorbidities is based on diagnostic codes (International Classification of Diseases, 10th edition [ICD-10]) in the claims data from January 1, 2015, to the test date.

<sup>c</sup>Use of medications within 3 months of the examination date was obtained from the database.
